# Supplementary material
Source: publisher figshare collection journal article supplement (https://acs.figshare.com/ndownloader/files/13176638)
Supplement: Supplementary file 1 [file 13176638]

## Sheet: S2a-PM C
			Rm2011-cis-hybrid			BL225C-cis-hybrid
	L-Arabinose
	D-Galactose			<			<
	L-Aspartic acid			<			<
	L-Proline						<
	D-Trehalose			>			>
	D-Mannose			<			<
	Dulcitol			<			<
	D-Sorbitol			>			<
	Glycerol						<
	L-Fucose						>
	D-Glucuronic acid						<
	D-Gluconic acid			<
	DL-a-Glycerol Phosphate			<
	D-Xylose			>
	L-Lactic acid			<
	Formic acid			<			<
	D-Mannitol			>			<
	L-Glutamic acid			>			<
	D-Glucose-6-Phosphate			<
	D-Galactonic acid-g-Lactone			<
	DL-Malic acid						<
	D-Ribose			>			>
	Tween 20			>			>
	L-Rhamnose			<
	D-Fructose			>
	Acetic acid			<			<
	a-D-Glucose						<
	D-Melibiose						<
	Thymidine			<			<
	L-Asparagine			<			>
	D-Glucosaminic acid			<			<
	1,2-Propanediol						<
	Tween 40			>			>
	a-Ketoglutaric acid
	a-Methyl-D-Galactoside						<
	a-D-Lactose			<			<
	Lactulose						<
	Sucrose			<			<
	Uridine			<			<
	L-Glutamine			>			<
	D-Glucose-1-Phosphate						<
	D-Fructose-6-Phosphate			>			>
	Tween 80			>			>
	a-Hydroxyglutaric acid-g-Lactone			<
	b-Methyl-D-Glucoside						<
	Adonitol						<
	Maltotriose						<
	Adenosine			<			<
	Gly-Asp			<			<
	m-Inositol						<
	Fumaric acid						<
	Propionic acid			>			<
	Mucic acid			<
	D-Cellobiose			>			<
	Inosine			<			<
	Gly-Glu			<			<
	L-Serine			<			<
	L-Alanine			<			<
	Ala-Gly			<			<
	Acetoacetic acid			<
	Mono-Methylsuccinate			<			<
	Methylpyruvate			>			<
	Gly-Pro			<			<
	D-Psicose			>
	L-Lyxose			>			>
	Pyruvic acid			>			<
	Glucuronamide			>			>
	L-Galactonic acid-g-Lactone						>
	D-Galacturonic acid			>			>
	2-Aminoethanol			<			<
	g-Cyclodextrin			<
	Dextrin			>			>
	Glycogen			<
	Laminarin			>			>
	Pectin			<			>
	Mannan			<			<
	N-Acetyl-D-Galactosamine			<			<
	b-D-Allose			>			<
	D-Arabinose			>			>
	D-Arabitol			>			>
	Arbutin			>			<
	2-Deoxy-D-Ribose			>			>
	i-Erythritol
	L-Arabitol
	D-Fucose						<
	Gentiobiose			>			>
	D-Lactitol			<			<
	D-Melezitose						<
	Maltitol						<
	a-Methyl-D-Glucoside						<
	b-Methyl-D-Galactoside			<			<
	3-Methylglucose
	Palatinose			>			>
	D-Raffinose
	Salicin			>
	L-Sorbose			>			>
	Stachyose
	D-Tagatose
	d-Amino Valeric acid			<			<
	Citramalic acid
	D-Glucosamine			>			>
	b-Hydroxybutyric acid			>
	g-Hydroxybutyric acid			<
	D-Lactic acid Methyl Ester			<
	5-Keto-D-Gluconic acid			>			>
	Malonic acid			>			>
	Melibionic acid			<			<
	D-Ribono-1,4-Lactone			<
	Sorbic acid			>			>
	Succinamic acid
	L-Alaninamide
	L-Arginine			<
	L-Histidine			<			<
	Hydroxy-L-Proline
	L-Leucine			<
	L-Lysine			<			<
	L-Ornithine			<			<
	D,L-Carnitine			>
	Dihydroxyacetone			>			>
	3-Hydroxy-2-buta			>			>

## Sheet: S2b-PM N
		Rm2011-cis-hybrid			BL225C-cis-hybrid
	Ammonia		<			<
	Nitrite		>			>
	Nitrate		>			<
	Urea		<			<
	Biuret		<			<
	L-Alanine					<
	L-Arginine					<
	L-Asparagine		>
	L-Aspartic acid		>			>
	L-Cysteine		>
	L-Glutamic acid		>
	L-Glutamine
	Glycine		<			<
	L-Histidine		<			<
	L-Isoleucine		>			<
	L-Leucine		>			>
	L-Lysine					<
	L-Methionine					<
	L-Phenylalanine
	L-Proline
	L-Serine		<			<
	L-Threonine		<			<
	L-Tryptophan		>			>
	L-Tyrosine		>
	L-Valine					>
	D-Alanine		<			<
	D-Asparagine					>
	D-Aspartic acid
	D-Glutamic acid
	D-Lysine		<			<
	D-Serine
	D-Valine
	L-Citrulline		<			<
	L-Homoserine					>
	L-Ornithine
	N-Acetyl-L-Glutamic acid
	N-Phthaloyl-L-Glutamic acid
	L-Pyroglutamic acid
	Hydroxylamine
	Methylamine		>			<
	N-Amylamine
	N-Butylamine
	Ethylamine
	Ethanolamine		<			<
	Ethylenediamine
	Putrescine
	Agmatine		<			<
	Histamine
	b-Phenylethylamine
	Tyramine					<
	Acetamide					<
	Formamide
	Glucuronamide
	DL-Lactamide					<
	D-Glucosamine		<			>
	D-Galactosamine
	D-Mannosamine		<			<
	N-Acetyl-D-Glucosamine					<
	N-Acetyl-D-Galactosamine		<			<
	N-Acetyl-D-Mannosamine
	Adenine		>
	Adenosine		>			>
	Cytidine					<
	Cytosine					<
	Guanine		>			>
	Guanosine		<			>
	Thymine		<			<
	Thymidine		<			<
	Uracil		<			<
	Uridine		<			<
	Inosine		<			<
	Xanthine		>
	Xanthosine		<
	Uric acid		<			<
	Alloxan		<			<
	Allantoin		<			<
	Parabanic acid					<
	DL-a-Amino-N-Butyric acid
	g-Amino-N-Butyric acid					>
	e-Amino-N-Caproic acid		<			<
	DL-a-Amino-Caprylic acid
	d-Amino-N-Valeric acid					<
	a-Amino-N-Valeric acid
	Ala-Asp					<
	Ala-Gln		>
	Ala-Glu		<			<
	Ala-Gly					<
	Ala-His		>
	Ala-Leu		<			<
	Ala-Thr
	Gly-Asn					<
	Gly-Gln					<
	Gly-Glu		<			<
	Gly-Met		<
	Met-Ala		<			<

## Sheet: S2c-tab Carbon complete
		BL225C	cis-hybrid	ΔpSymA
L-Arabinose	4	4	4	4
N-Acetyl-D-Glucosamine	4	4	4	4
D-Saccharic acid	0	0	0	0
Succinic acid	4	4	4	3
D-Galactose	4	4	3.5	4
L-Aspartic acid	3	3	0.5	1
L-Proline	3	4	3	3
D-Alanine	0	0	0	0
D-Trehalose	3	0	3.5	4
D-Mannose	4	4	3.5	3
Dulcitol	3	3	2	1
D-Serine	0	0	0	0
D-Sorbitol	3	4	3.5	4
Glycerol	3	4	3	3
L-Fucose	3	0	3	3.5
D-Glucuronic acid	0	1	0	0
D-Gluconic acid	1	0	0	0
DL-a-Glycerol Phosphate	1	0	0	0
D-Xylose	3	4	4	4
L-Lactic acid	3	0	1.5	3
Formic acid	4	4	3	1.5
D-Mannitol	3	4	3.5	4
L-Glutamic acid	3	4	3.5	3
D-Glucose-6-Phosphate	1	0	0	0.5
D-Galactonic acid-g-Lactone	1	0	0	0
DL-Malic acid	3	4	3	4
D-Ribose	3	0	4	4
Tween 20	1	0	4	4
L-Rhamnose	3	4	3	4
D-Fructose	3	4	4	4
Acetic acid	3	4	2	3
a-D-Glucose	3	4	3	3
Maltose	3	3	3	3
D-Melibiose	3	4	3	3
Thymidine	3	3	0	0
L-Asparagine	3	0	1.5	2
D-Aspartic acid	0	0	0	0
D-Glucosaminic acid	1	1	0.5	1
1,2-Propanediol	0	1	0	0
Tween 40	0	0	3	4
a-Ketoglutaric acid	1	0	0	0
a-Ketobutyric acid	0	0	0	0
a-Methyl-D-Galactoside	3	4	3	3
a-D-Lactose	2	4	2.5	3
Lactulose	3	4	3	3
Sucrose	4	4	3.5	4
Uridine	3	4	0.5	0.5
L-Glutamine	3	4	3.5	3
m-Tartaric acid	0	0	0	0
D-Glucose-1-Phosphate	0	1	0	0
D-Fructose-6-Phosphate	0	0	0.5	0
Tween 80	0	0	1.5	3.5
a-Hydroxyglutaric acid-g-Lactone	1	0	0	0
a-Hydroxybutyric acid	0	0	0	0
b-Methyl-D-Glucoside	3	4	3	3
Adonitol	3	4	3	3
Maltotriose	3	4	3	3
2`-Deoxyadenosine	0	0	0	0
Adenosine	4	4	0.5	0.5
Gly-Asp	3	3	0.5	0.5
Citric acid	0	0	0	0
m-Inositol	3	4	3	3
D-Threonine	0	0	0	0
Fumaric acid	3	4	3	4
Bromosuccinic acid	3	3	3	1.5
Propionic acid	0	3	2	1
Mucic acid	1	0	0	0
Glycolic acid	0	0	0	0
Glyoxylic acid	0	0	0	0
D-Cellobiose	3	4	3.5	4
Inosine	4	2	0	0.5
Gly-Glu	3	3	0	1
Tricarballylic acid	0	0	0	0
L-Serine	1	3	0	0
L-Threonine	0	0	0	0
L-Alanine	3	3	1	1
Ala-Gly	3	3	0.5	1
Acetoacetic acid	1	0	0	0
N-Acetyl-D-Mannosamine	0	0	0	0
Mono-Methylsuccinate	3	3	0	0
Methylpyruvate	0	3	2	3
D-Malic acid	1	3	0.5	0
L-Malic acid	4	4	4	4
Gly-Pro	3	3	0	0.5
p-Hydroxyphenyl Acetic acid	0	0	0	0
m-Hydroxyphenyl Acetic acid	0	0	0	0
Tyramine	0	0	0	0
D-Psicose	3	4	4	3.5
L-Lyxose	0	3	4	4
Glucuronamide	0	0	1	1
Pyruvic acid	0	3	1.5	3
L-Galactonic acid-g-Lactone	1	0	0.5	0
D-Galacturonic acid	0	0	0.5	0
Phenylethylamine	0	0	0	0
2-Aminoethanol	3	3	1.5	0
Chondroitin Sulfate C	0	0	0	0
a-Cyclodextrin	0	0	0	0.5
b-Cyclodextrin	0	0	0	0
g-Cyclodextrin	1	0	0	0
Dextrin	0	0	1	3
Gelatin	0	0	0	0
Glycogen	1	0	0	0
Inulin	0	0	0	0
Laminarin	1	1	4	4
Mannan	1	1	0	0
Pectin	3	0	1.5	3
N-Acetyl-D-Galactosamine	3	3	1	1
N-Acetyl-Neuraminic acid	0	0	0	0
b-D-Allose	0	1	0.5	0
Amygdalin	0	0	0	0
D-Arabinose	3	3	4	3.5
D-Arabitol	3	3	3.5	4
L-Arabitol	3	3	3	3
Arbutin	1	3	2	3
2-Deoxy-D-Ribose	0	0	3	3
i-Erythritol	3	3	3	3
D-Fucose	1	3	1	1
3-O-b-D-Galactopyranosyl-D-Arabinose	0	0	0	0
Gentiobiose	3	3	3.5	4
L-Glucose	0	0	0	0
D-Lactitol	3	3	0	0
D-Melezitose	0	3	0	0.5
Maltitol	1	3	1	3
a-Methyl-D-Glucoside	0	1	0	0
b-Methyl-D-Galactoside	3	3	0	1.5
3-Methylglucose	3	3	3	0
b-Methyl-D-Glucuronic acid	0	0	0	0
a-Methyl-D-Mannoside	0	0	0	0
b-Methyl-D-Xyloside	3	3	3	3
Palatinose	1	3	2.5	1.5
D-Raffinose	3	3	3	3
Salicin	1	3	3	3
Sedoheptulosan	0	0	0	0
L-Sorbose	1	1	2	2
Stachyose	0	0	0	0
D-Tagatose	3	3	3	2
Turanose	3	3	3	3.5
Xylitol	0	0	0	0
N-Acetyl-D-Glucosaminitol	0	0	0	0
g-Amino-N-Butyric acid	1	1	1	1
d-Amino Valeric acid	1	1	0.5	0.5
Butyric acid	0	0	0	0
Capric acid	0	0	0	0
Caproic acid	0	0	0	0
Citraconic acid	0	0	0	0
Citramalic acid	0	0	0	0
D-Glucosamine	1	1	4	4
2-Hydroxybenzoic acid	0	0	0	0
4-Hydroxybenzoic acid	0	0	0	0
b-Hydroxybutyric acid	0	1	1	0
g-Hydroxybutyric acid	1	0	0	0
a-Keto-Valeric acid	0	0	0	0
Itaconic acid	0	0	0	0
5-Keto-D-Gluconic acid	1	1	3	1.5
D-Lactic acid Methyl Ester	1	0	0	0
Malonic acid	0	0	0.5	0
Melibionic acid	3	3	2	2
Oxalic acid	0	0	0	0
Oxalomalic acid	0	0	0	0
Quinic acid	0	0	0	0
D-Ribono-1,4-Lactone	1	0	0	0
Sebacic acid	0	0	0	0
Sorbic acid	0	0	1	0.5
Succinamic acid	1	0	0	0
D-Tartaric acid	0	0	0	0
L-Tartaric acid	0	0	0	0
Acetamide	0	0	0	0
L-Alaninamide	0	0	0	0
N-Acetyl-L-Glutamic acid	0	0	0	0
L-Arginine	1	0	0	1
Glycine	0	0	0	0
L-Histidine	2	2	1	1
L-Homoserine	0	0	0	0
Hydroxy-L-Proline	3	3	3	3
L-Isoleucine	0	0	0	0
L-Leucine	1	0	0	0.5
L-Lysine	3	1	0.5	1
L-Methionine	0	0	0	0
L-Ornithine	3	1	0	1
L-Phenylalanine	0	0	0	0
L-Pyroglutamic acid	0	0	0	0
L-Valine	0	0	0	0
D,L-Carnitine	0	3	3	3
sec-Butylamine	0	0	0	0
D,L-Octopamine	0	0	0	0
Putrescine	0	0	0	0
Dihydroxyacetone	0	0	4	4
2,3-Butanediol	0	0	0	0
2,3-Butanedione	0	0	0	0.5
3-Hydroxy-2-buta	0	0	0.5	0.5

## Sheet: S2d-tab Nitrogen complete
	Rm2011	BL225C	cis-hybrid	ΔpSymA
Negative Control	0	0	0	0
Ammonia	4	4	3	0
Nitrite	0	0	2	0
Nitrate	2	4	3	3
Urea	4	4	3	4
Biuret	1	1	0	0
L-Alanine	3	4	3	3
L-Arginine	3	4	3	4
L-Asparagine	3	4	4	4
L-Aspartic acid	0	2	4	4
L-Cysteine	3	4	4	3
L-Glutamic acid	3	4	4	4
L-Glutamine	4	4	4	4
Glycine	3	3	1	2
L-Histidine	4	4	3	4
L-Isoleucine	0	3	1	2
L-Leucine	2	2	3	3
L-Lysine	3	4	3	3
L-Methionine	0	1	0	1
L-Phenylalanine	0	0	0	0
L-Proline	2	2	2	3
L-Serine	3	4	0	3
L-Threonine	1	1	0	0
L-Tryptophan	0	0	2	4
L-Tyrosine	0	1	1	0
L-Valine	1	0	1	2
D-Alanine	3	1	0	3
D-Asparagine	1	0	1	0
D-Aspartic acid	0	0	0	0
D-Glutamic acid	0	0	0	0
D-Lysine	1	1	0	0
D-Serine	0	0	0	0
D-Valine	0	0	0	0
L-Citrulline	3	2	0	3
L-Homoserine	1	0	1	0
L-Ornithine	4	4	4	4
N-Acetyl-L-Glutamic acid	0	0	0	0
N-Phthaloyl-L-Glutamic acid	0	0	0	0
L-Pyroglutamic acid	0	0	0	0
Hydroxylamine	0	0	0	0
Methylamine	1	4	2	3
N-Amylamine	0	0	0	0
N-Butylamine	0	0	0	1
Ethylamine	0	0	0	1
Ethanolamine	3	2	0	1
Ethylenediamine	0	0	0	0
Putrescine	0	0	0	0
Agmatine	1	2	0	3
Histamine	0	0	0	0
b-Phenylethylamine	0	0	0	0
Tyramine	0	1	0	0
Acetamide	0	1	0	0
Formamide	0	1	0	0
Glucuronamide	2	2	2	3
DL-Lactamide	3	4	3	3
D-Glucosamine	1	2	0	3
D-Galactosamine	0	0	0	3
D-Mannosamine	3	2	1	4
N-Acetyl-D-Glucosamine	3	4	3	3
N-Acetyl-D-Galactosamine	3	2	1	2
N-Acetyl-D-Mannosamine	0	0	0	1
Adenine	0	1	1	1
Adenosine	0	2	3	3
Cytidine	1	2	1	2
Cytosine	3	4	3	0
Guanine	2	2	3	3
Guanosine	3	4	3	3
Thymine	1	3	0	0
Thymidine	1	2	0	1
Uracil	3	3	0	0
Uridine	1	3	0	0
Inosine	1	2	0	2
Xanthine	3	4	4	4
Xanthosine	3	2	2	2
Uric acid	4	4	3	3
Alloxan	1	1	0	4
Allantoin	3	4	0	2
Parabanic acid	0	1	0	0
DL-a-Amino-N-Butyric acid	0	0	0	0
g-Amino-N-Butyric acid	3	2	3	3
e-Amino-N-Caproic acid	1	1	0	0
DL-a-Amino-Caprylic acid	0	0	0	1
d-Amino-N-Valeric acid	1	3	1	1
a-Amino-N-Valeric acid	0	0	0	0
Ala-Asp	3	4	3	2
Ala-Gln	0	4	4	4
Ala-Glu	4	4	2	2
Ala-Gly	3	4	3	2
Ala-His	0	4	4	3
Ala-Leu	3	4	2	2
Ala-Thr	3	3	3	2
Gly-Asn	3	4	3	4
Gly-Gln	3	4	3	4
Gly-Glu	3	4	1	2
Gly-Met	3	2	2	2
Met-Ala	4	4	0	1
